# Supplementary material for: Virtual and Actual Humanoid Robot Control with Four-Class Motor-Imagery-Based Optical Brain-Computer Interface
Source: PubMed Central journal article supplement (PMC5539938; doi:10.1155/2017/1463512), 2017-07-18
Supplement: 1463512.f1.pdf [file 1463512.f1.pdf]

# Supplementary Material

for

## **Virtual and Actual Humanoid Robot Control with Four-Class Motor-Imagery Based Optical Brain Computer Interface**

Alyssa M. Batula, Youngmoo E. Kim, Hasan Ayaz

### **Contents**

- **Table S1:** Post-hoc analysis of Task, Robot Type, and Task\*Robot Type
- **Table S2:** Post-hoc analysis of Robot Type

- **Table S1:** Post-hoc analysis of Task, Robot Type, and Task\*Robot Type. Effect of Task (4 levels: left hand, left foot, right foot, right hand), Robot Type (2 levels: virtual, DARwIn-OP) and their interaction on HbO activation for individual optodes. Significant effects ( $p < 0.05$ , FDR corrected) are highlighted in bold.

| Optode | Task    |         | Robot Type |         | Task*Robot Type |         |
|--------|---------|---------|------------|---------|-----------------|---------|
|        | F-value | p-value | F-value    | p-value | F-value         | p-value |
| 1      | 0.9408  | 0.5522  | 0.2924     | 0.6941  | 0.4105          | 0.8948  |
| 2      | 0.9346  | 0.5522  | 1.0982     | 0.5463  | 0.8245          | 0.7127  |
| 3      | 1.7630  | 0.4717  | 1.8804     | 0.4580  | 2.4475          | 0.5186  |
| 4      | 0.9346  | 0.5522  | 5.9306     | 0.1258  | 0.8028          | 0.7127  |
| 5      | 0.9963  | 0.5522  | 0.0479     | 0.8812  | 0.2471          | 0.9298  |
| 6      | 2.6925  | 0.3333  | 1.2457     | 0.5463  | 0.0336          | 0.9917  |
| 7      | 0.7741  | 0.6119  | 0.8556     | 0.6107  | 1.4346          | 0.6509  |
| 8      | 2.3763  | 0.3400  | 8.7333     | 0.0829  | 1.0739          | 0.6931  |
| 9      | 3.0851  | 0.3333  | 0.6942     | 0.6223  | 1.6322          | 0.6509  |
| 10     | 0.5928  | 0.7089  | 1.1857     | 0.5463  | 1.4265          | 0.6509  |
| 11     | 0.9551  | 0.5522  | 2.9775     | 0.2942  | 0.2902          | 0.9298  |
| 12     | 0.9441  | 0.5522  | 0.2649     | 0.6941  | 0.8360          | 0.7127  |
| 13     | 1.2165  | 0.5522  | 0.6673     | 0.6223  | 1.5536          | 0.6509  |
| 14     | 0.9103  | 0.5522  | 0.0014     | 0.9703  | 1.4005          | 0.6509  |
| 15     | 0.1481  | 0.9308  | 0.0386     | 0.8812  | 0.6334          | 0.7922  |
| 16     | 1.7515  | 0.4717  | 5.3634     | 0.1286  | 4.0993          | 0.1764  |
| 17     | 0.1912  | 0.9308  | 3.5790     | 0.2393  | 0.2076          | 0.9298  |
| 18     | 3.3699  | 0.3333  | 1.5520     | 0.5145  | 1.2026          | 0.6924  |
| 19     | 1.1593  | 0.5522  | 0.3174     | 0.6941  | 1.0408          | 0.6931  |
| 20     | 2.0345  | 0.4397  | 0.4267     | 0.6941  | 2.4621          | 0.5186  |
| 21     | 0.9798  | 0.5522  | 7.3015     | 0.0894  | 0.4121          | 0.8948  |
| 22     | 0.2200  | 0.9308  | 0.4009     | 0.6941  | 1.1818          | 0.6924  |
| 23     | 2.5623  | 0.3333  | 2.0236     | 0.4580  | 1.8086          | 0.6509  |
| 24     | 1.1079  | 0.5522  | 4.0037     | 0.2237  | 0.7825          | 0.7127  |

**Table S2:** Post-hoc analysis of Robot Type. Effect of Robot Type (2 levels: virtual, DARwIn-OP) on HbO activation for individual optodes and tasks. Significant effects ( $p < 0.05$ , FDR corrected) are highlighted in bold.

| <b>Optode</b> | <b>Left Hand</b> | <b>Left Foot</b> | <b>Right Foot</b> | <b>Right Hand</b> |
|---------------|------------------|------------------|-------------------|-------------------|
| 1             | 0.9807           | 0.6630           | 0.5577            | 0.8224            |
| 2             | 0.1448           | 0.1358           | 0.9004            | 0.3222            |
| 3             | 0.4626           | 0.5369           | 0.0642            | 0.2045            |
| 4             | 0.5086           | 0.4521           | <b>0.0194</b>     | 0.4521            |
| 5             | 0.8119           | 0.6378           | 0.2193            | 0.9781            |
| 6             | 0.2530           | 0.7184           | 0.8019            | <b>0.0261</b>     |
| 7             | 0.5958           | 0.3246           | 0.8019            | 0.4311            |
| 8             | 0.1304           | 0.7213           | 0.6216            | 0.5574            |
| 9             | 0.7780           | 0.4521           | <b>0.0386</b>     | 0.5442            |
| 10            | 0.7267           | 0.5878           | 0.5574            | 0.9004            |
| 11            | 0.5574           | 0.1464           | 0.2451            | 0.3952            |
| 12            | 0.4785           | 0.3536           | 0.0532            | 0.5369            |
| 13            | 0.8224           | 0.6638           | 0.2451            | 0.5086            |
| 14            | <b>0.0261</b>    | <b>0.0386</b>    | 0.6216            | 0.5574            |
| 15            | 0.8655           | 0.8119           | 0.4961            | 0.8119            |
| 16            | <b>0.0261</b>    | 0.6216           | <b>0.0396</b>     | 0.1740            |
| 17            | 0.7856           | 0.8576           | 0.5369            | 0.6354            |
| 18            | 0.2451           | 0.4455           | <b>0.0325</b>     | 0.5574            |
| 19            | 0.8119           | 0.4961           | 0.9807            | 0.6216            |
| 20            | 0.9334           | 0.1308           | <b>0.0261</b>     | 0.9614            |
| 21            | 0.4723           | 0.8052           | 0.5087            | 0.7267            |
| 22            | 0.5146           | 0.4521           | 0.6216            | 0.5442            |
| 23            | 0.6636           | 0.4961           | <b>0.0261</b>     | 0.6493            |
| 24            | 0.4740           | 0.5756           | 0.1308            | 0.5577            |
